# Supplementary material
Source: PubMed Central journal article supplement (PMC3670562)
Supplement: Supp_Data.pdf [file Supp_Data.pdf]

## Supplementary Data

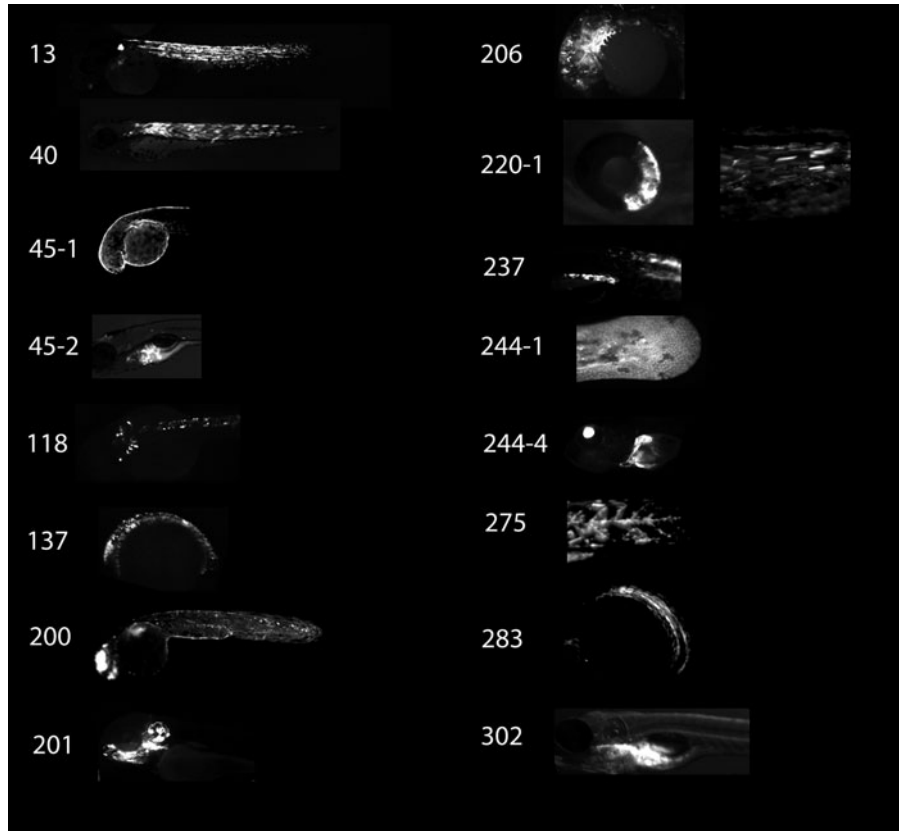

**SUPPLEMENTARY FIG. S1.** Overview of identified enhancer trap lines. Microscopy images of enhancer trap lines identified in the screen, demonstrate representative views of GFP expression in the tissues and embryonic stages described in Table 2.
